# Supplementary material for: Superior Dislocation of the Mandibular Condyle into the Middle Cranial Fossa: A Comprehensive Review of the Literature
Source: MDPI journal article supplement (doi:10.3390/jcm12113781), 2023-05-31
Supplement: s1 [file s1]

Table S2. Summary of treatments and follow-up

| Author/Year of publication        | Traction | Attempt to closed reduction | Treatment                                                                | Delay to treatment (days)      | Approach                  | TMJ surgery      | Glenoid fossa reconstruction                                                                             | Complication of surgical procedure | Fixation (days) | Physical training | Length of training (months) | Orthognathic or orthodontic treatment     | Follow-up (months) | Maximal mouth opening at follow-up (mm)      | Deviation at follow-up | Sequedae                                                                   |
|-----------------------------------|----------|-----------------------------|--------------------------------------------------------------------------|--------------------------------|---------------------------|------------------|----------------------------------------------------------------------------------------------------------|------------------------------------|-----------------|-------------------|-----------------------------|-------------------------------------------|--------------------|----------------------------------------------|------------------------|----------------------------------------------------------------------------|
| Lefevre de Rochefort (1834) [1]   | NA       | NA                          | inflammation relief?                                                     | NA                             | NA                        | NA               | NA                                                                                                       | NA                                 | NA              | NA                | NA                          | NA                                        | 5                  | NR                                           | NR                     | died of brain abscess 157 days after the injury                            |
| Heidsieck (1960) [2]              | NA       | NA                          | NA                                                                       | NA                             | NA                        | NA               | NA                                                                                                       | NA                                 | NA              | NA                | NA                          | NA                                        | NR                 | NR                                           | NR                     | NR                                                                         |
| Dingman & Grabb (1963) [3]        | N        | N                           | open reduction with condylotomy                                          | 31                             | NR                        | condylotomy      | fascia lata graft                                                                                        | N                                  | Y               | NR                | NR                          | R step osteotomy and L vertical osteotomy | 90                 | NR                                           | N                      | NR                                                                         |
| Doane (1963) [4]                  | Y        | Y                           | open reduction with craniotomy and gap arthroplasty                      | 18                             | preauricular and coronal  | gap arthroplasty | NA                                                                                                       | N                                  | Y               | NR                | NR                          | NA                                        | 36                 | NR                                           | NR                     | NR                                                                         |
| Steinhäuser (1964) [5]            | Y        | NR                          | closed reduction with traction by cap-splint                             | 21                             | closed                    | NA               | NA                                                                                                       | NA                                 | 14              | Y                 | 2                           | NA                                        | 6                  | 37                                           | N                      | NR                                                                         |
| Peltier & Matthews (1965) [6]     | Y        | Y                           | first, reduction of mental area; second, open reduction with condylotomy | 54?                            | submandibular incision    | condylotomy      | Gelfoam                                                                                                  | N                                  | 42              | Y                 | NR                          | NA                                        | 6                  | NR                                           | minimally to the R     | NR                                                                         |
| Stoltmann (1965) [7]              | Y        | N                           | open reduction with craniotomy and condylectomy                          | immediate                      | subtemporal               | condylectomy     | NA                                                                                                       | N                                  | 42              | NR                | NR                          | NA                                        | 60                 | able to open widely                          | NR                     | NR                                                                         |
|                                   | Y        | N                           | open reduction with craniotomy and condylectomy                          | immediate                      | subtemporal               | condylectomy     | NA                                                                                                       | facial nerve paralysis             | 42              | NR                | NR                          | NA                                        | NR                 | no symptom                                   | NR                     | NR                                                                         |
| Cemá et al. (1965) [8]            | N        | N                           | open reduction with craniotomy and condylectomy                          | 970                            | submandibular             | condylectomy     | NR                                                                                                       | N                                  | NR              | NR                | NR                          | NR                                        | 25                 | 40                                           | to R                   | obvious atrophy of the R mandible                                          |
| Dedaume et al. (1965) [9]         | N        | NR                          | open reduction with craniotomy and condylectomy                          | 5,052 (13 years and 10 months) | preauricular              | condylectomy     | NR                                                                                                       | N                                  | 21              | NR                | NR                          | NR                                        | 20                 | 35                                           | to L                   | NR                                                                         |
| Whitacre (1965) [10]              | N        | N                           | open reduction with craniotomy and condylectomy                          | 10                             | preauricular              | condylectomy     | NR                                                                                                       | N                                  | NR              | NR                | NR                          | NR                                        | 26                 | NR                                           | moderately to the L    | NR                                                                         |
| Brons (1967) [11]                 | N        | Y                           | fabrication of new dentures                                              | 20                             | intraoral                 | NA               | NA                                                                                                       | N                                  | NA              | NA                | NR                          | N                                         | 18                 | 32                                           | N                      | occurrence of “hearse” at the L TMJ                                        |
| Rowe & Killey (1968) [12]         | N        | Y                           | open reduction with condylectomy                                         | NR                             | extensive preauricular    | condylectomy     | meniscus                                                                                                 | N                                  | 14              | NR                | NR                          | N                                         | NR                 | almost normal range                          | NR                     | NR                                                                         |
| Pirok & Merrill (1970) [13]       | Y        | N                           | conservative                                                             | NA                             | NA                        | NA               | NA                                                                                                       | N                                  | 42              | Y                 | NR                          | N                                         | 18                 | satisfactory                                 | NR                     | NR                                                                         |
| Lund (1971) [14]                  | N        | N                           | fabrication of new dentures                                              | 60?                            | NA                        | NA               | NA                                                                                                       | N                                  | NA              | NA                | NA                          | N                                         | 24                 | 37 mm between the edentulous alveolar ridges | 10 mm to the L         | NR                                                                         |
| Seymour & Irby (1976) [15]        | NR       | N                           | open reduction with condylotomy                                          | 10                             | extensive preauricular    | condylotomy      | a prosthetic glenoid fossa that was fashioned out of Silastic and wired into position through the zygoma | N                                  | Y               | NR                | NR                          | N                                         | 2                  | 26                                           | N                      | NR                                                                         |
| Pons et al. (1976) [16]           | N        | Y                           | open reduction with craniotomy and condylectomy                          | 255                            | preauricular and coronal  | condylectomy     | temporal bone graft                                                                                      | N                                  | 14              | NR                | NR                          | N                                         | NR                 | 30                                           | slightly to the R      | NR                                                                         |
| Kallal et al. (1977) [17]         | N        | Y                           | closed manual reduction using a Molt mouth prop                          | 5                              | NA                        | NA               | NA                                                                                                       | N                                  | 14              | NR                | NR                          | genioplasty                               | 42                 | NR                                           | NR                     | a foreshortening of the R condyle with flattening of the articular surface |
| Zecha (1977) [18]                 | N        | Y                           | closed manual reduction                                                  | 2                              | NA                        | NA               | NA                                                                                                       | N                                  | 7               | Y                 | NR                          | N                                         | 18                 | 34                                           | to the R               | NR                                                                         |
| Schneller (1979) [19]             | Y        | Y                           | closed manual reduction                                                  | 10                             | closed                    | NA               | NA                                                                                                       | N                                  | 3               | Y                 | NR                          | N                                         | 2                  | 24                                           | NR                     | NR                                                                         |
| Iannetti & Martucci (1980) [20]   | NR       | NR                          | open reduction using a lateral mouth prop and meniscectomy               | 5                              | retrotragal preauricular  | meniscectomy     | reconstruction using a silicone rubber                                                                   | N                                  | 15              | Y                 | NR                          | N                                         | NR                 | NR                                           | NR                     | NR                                                                         |
| Pieritz & Schmidseder (1981) [21] | Y        | Y                           | closed reduction using a retractor to sigmoid notch                      | 10                             | approach to sigmoid notch | NA               | NA                                                                                                       | N                                  | NR              | NR                | NR                          | NR                                        | 19                 | moderate restriction                         | NR                     | R ear deafness                                                             |
| Lachard et al. (1981) [22]        | NR       | Y                           | closed manual reduction ?                                                | NR                             | closed ?                  | NA ?             | NA ?                                                                                                     | R facial nerve paralysis           | 14              | NR                | NR                          | NR                                        | 12                 | 30                                           | NR                     | NR                                                                         |
|                                   | NR       | NR                          | open reduction with condylectomy                                         | 100?                           | preauricular              | condylectomy     | NR                                                                                                       | NR                                 | NR              | NR                | NR                          | NR                                        | 27                 | 39                                           | to the R               | NR                                                                         |
|                                   | NR       | NR                          | open reduction with condylectomy?                                        | NR                             | preauricular ?            | condylectomy ?   | NR                                                                                                       | R facial nerve paralysis           | NR              | NR                | NR                          | NR                                        | NR                 | 27                                           | NR                     | NR                                                                         |

|                                 |    |    |                                                                                                                                   |                       |                                    |                                                |                                               |                                                                |    |    |     |                                                |     |                    |                        |                                                   |
|---------------------------------|----|----|-----------------------------------------------------------------------------------------------------------------------------------|-----------------------|------------------------------------|------------------------------------------------|-----------------------------------------------|----------------------------------------------------------------|----|----|-----|------------------------------------------------|-----|--------------------|------------------------|---------------------------------------------------|
| Ihalainen & Tasanen (1983) [23] | N  | Y  | closed manual reduction                                                                                                           | immediate             | NA                                 | NA                                             | NA                                            | N                                                              | N  | NR | NR  | N                                              | 16  | 35                 | 4 mm to the R          | increased degenerative changes in the R condyle   |
| Metzner et al. (1984) [24]      | NA | NA | NA                                                                                                                                | NA                    | NA                                 | NA                                             | NA                                            | N                                                              | NA | NA | NA  | N                                              | NA  | NA                 | NA                     | died 6 hours after the injury                     |
| Pepper & Zide (1985) [25]       | N  | Y  | open manual reduction and removal of fractured segment of the condyle                                                             | 4                     | preauricular                       | reconstruction using a Proplast teflon implant | free graft of the temporal fascia and muscle  | neuroparaxia of the facial nerve                               | 21 | Y  | 6   | N                                              | 18  | excellent function | N                      | NR                                                |
| Copenhaver et al. (1985) [26]   | N  | Y  | closed manual reduction                                                                                                           | 2                     | NA                                 | NA                                             | NA                                            | N                                                              | 21 | Y  | 0.5 | N                                              | 8   | 35                 | minimally to the R     | slight resorption of the R condyle                |
| Rappaport et al. (1986) [27]    | N  | N  | open manual reduction, reduction of parasymphysal and zygomatic arch fractures                                                    | immediate             | intraoral                          | NA                                             | NA                                            | R facial nerve paralysis                                       | 25 | NR | NR  | N                                              | 15  | 40                 | minimally to the R     | NR                                                |
| Musgrove (1986) [28]            | Y  | Y  | closed reduction using cap splints and wires (circum-mandibular, transalveolar, and ascending ramus)                              | 3                     | submandibular                      | NA                                             | NA                                            | N                                                              | 15 | Y  | 0.5 | N                                              | 6   | slight limitation  | NR                     | NR                                                |
| Masaki et al. (1988) [29]       | NR | Y  | open reduction with arthroplasty                                                                                                  | 29                    | preauricular?                      | arthroplasty                                   | Proplast fixation                             | N                                                              | NR | Y  | NR  | N                                              | 10  | 50                 | NR                     | NR                                                |
| Paulette et al. (1989) [30]     | N  | Y  | closed reduction using Erich arch bars and towel clips                                                                            | 7                     | NA                                 | NA                                             | NA                                            | N                                                              | Y  | NR | NR  | NR                                             | 10  | full range         | slightly to the L      | NR                                                |
| Christiansen (1989) [31]        | Y  | N  | open reduction with craniotomy                                                                                                    | NR                    | coronal and bilateral preauricular | minimal condylar shaving                       | rib graft                                     | N                                                              | 42 | NR | NR  | orthodontic treatment                          | 12  | 44                 | very apparent to the L | surgery to correct the deviation in consideration |
|                                 | N  | N  | open manual reduction                                                                                                             | 180                   | preauricular                       | NR                                             | NR                                            | N                                                              | Y  | NR | NR  | NR                                             | NR  | 50                 | NR                     | NR                                                |
| Baldwin (1990) [32]             | N  | Y  | closed reduction using a Fergusson gag                                                                                            | 1                     | closed                             | NA                                             | NA                                            | N                                                              | 14 | Y  | 2   | NR                                             | 24  | 24                 | N                      | degenerative change of the R condyle              |
| Kamiya et al. (1990) [33]       | N  | Y  | open reduction with craniotomy and reduction using a steel wire                                                                   | 2                     | coronal and preauricular           | removal of condyle and disk fragments          | silicon plate and temporal fascia             | N                                                              | 30 | Y  | NR  | N                                              | 7   | 45                 | 5 mm to the L          | NR                                                |
| Galioto et al. (1991) [34]      | N  | N  | open reduction with craniotomy and reduction of symphyseal fracture                                                               | NR                    | temporal and preauricular          | osteosynthesis of the fractured condyle        | temporal bone graft                           | neuroparaxia of the facial nerve                               | 14 | Y  | NR  | N                                              | 10  | normal             | N                      | NR                                                |
| Marker (1992) [35]              | N  | Y  | closed manual reduction                                                                                                           | immediate             | closed                             | NA                                             | NA                                            | N                                                              | 14 | Y  | NR  | N                                              | 24  | 29                 | NR                     | absorption of osteophyte of the R condyle         |
| Engvall & Fischer (1992) [36]   | Y  | N  | first, craniotomy with extraction of a fractured piece roof of the glenoid fossa and replacement with fascia; second, condylotomy | first, 14; second, 56 | temporal and preauricular          | transverse osteotomy of the condylar neck      | titan plates placed on the zygomatic arch     | TMJ dysfunction and anterior open bite                         | 42 | NR | NR  | maxillary impaction and mandibular advancement | 36  | 36                 | N                      | slight tenderness in the TMJ                      |
| Hamamoto et al. (1992) [37]     | N  | Y  | closed reduction using a steel-bar placed between the upper and lower molars                                                      | 1                     | closed                             | NA                                             | NA                                            | N                                                              | 7  | Y  | NR  | N                                              | 4   | 40                 | to the L               | NR                                                |
| Chuong (1994) [38]              | N  | Y  | open reduction using a periosteal elevator simultaneously using a bone clamp                                                      | NR                    | modified endaural                  | disk repositioning                             | outer table cranial graft                     | N                                                              | 6  | Y  | NR  | N                                              | 2   | 36                 | slightly to the R      | diminished hearing on the R                       |
| Dahlberg et al. (1995) [39]     | NR | NR | craniotomy, evacuation of hematoma, removal of a fragment of the glenoid fossa                                                    | 2                     | temporal                           | NA                                             | N                                             | N                                                              | NR | NR | NR  | NR                                             | 24  | 48                 | to the R               | a discrete facial asymmetry                       |
| Tomes & Lind (1995) [40]        | Y  | N  | open reduction with condylotomy and coronoidectomy                                                                                | 720                   | extraoral                          | condylotomy and coronoidectomy                 | N                                             | N                                                              | Y  | Y  | 21  | N                                              | 60  | 35                 | to the R               | NR                                                |
| Sandler et al. (1996) [41]      | N  | N  | open reduction with temporal craniotomy, inferior temporal lobectomy, and tracheostomy                                            | 1                     | hemicoronal                        | NA                                             | repair using temporal bone and ultramicropate | facial nerve paralysis due to a total common carotid occlusion | NR | Y  | NR  | NR                                             | 0.5 | 35                 | NR                     | NR                                                |
| Ide et al. (1996) [42]          | Y  | Y  | closed reduction using elastic traction using a Schuchardt splint                                                                 | 1                     | closed                             | NA                                             | NA                                            | N                                                              | 28 | NR | NR  | N                                              | 72  | 51                 | to the L               | NR                                                |

|                                |    |    |                                                                                                                                                                         |                 |                                       |                                                                                  |                                                                                                                        |                                                                 |    |    |    |                                                           |    |                        |                    |                                                                                                    |
|--------------------------------|----|----|-------------------------------------------------------------------------------------------------------------------------------------------------------------------------|-----------------|---------------------------------------|----------------------------------------------------------------------------------|------------------------------------------------------------------------------------------------------------------------|-----------------------------------------------------------------|----|----|----|-----------------------------------------------------------|----|------------------------|--------------------|----------------------------------------------------------------------------------------------------|
| Long et al (1997) [43]         | N  | NR | open reduction by upward pressure applied to the chin using a piece of rubber                                                                                           | 15              | preauricular                          | smoothing of the condylar head and repair of the disk with sutures               | T-shaped titanium miniplate adapted across the glenoid fossa                                                           | N                                                               | NR | NR | NR | N                                                         | NR | good condylar movement | N                  | NR                                                                                                 |
| Benech et al. (1997) [44]      | N  | N  | osteosynthesis of the R body and the L angle fractures                                                                                                                  | 6               | NR                                    | NA                                                                               | NA                                                                                                                     | N                                                               | N  | NR | NR | NR                                                        | 12 | no limitation          | NR                 | sporadic tinnitus                                                                                  |
| Melugin et al. (1997) [45]     | NR | NR | open reduction with condylotomy                                                                                                                                         | 84              | modified endaural                     | condylotomy                                                                      | bone graft with freeze-dried, demineralized, allogeneic rib cortex, and fresh-frozen allogeneic femoral head cartilage | N                                                               | NR | NR | NR | N                                                         | NR | 41                     | to the L           | NR                                                                                                 |
| Koretsch et al. (2001) [46]    | N  | Y  | closed manual reduction                                                                                                                                                 | 2               | NA                                    | NA                                                                               | NA                                                                                                                     | N                                                               | 14 | Y  | 2  | N                                                         | 24 | 48                     | to the L           | significant resorption of the L condyle                                                            |
| DeFabianis (2001) [47]         | N  | Y  | open manual reduction                                                                                                                                                   | 210             | temporal and preauricular             | substitute of the disk by a Gore-Tex membrane                                    | bone graft                                                                                                             | N                                                               | NR | Y  | 3  | NR                                                        | 3  | 29                     | 5.5 mm to the L    | a moderate decrease in vertical height of the L mandible                                           |
| Hayashi et al. (2001) [48]     | N  | N  | open reduction with condylotomy                                                                                                                                         | 60              | preauricular                          | condylotomy                                                                      | auricular cartilage                                                                                                    | N                                                               | NR | Y  | NR | orthodontic treatment                                     | 24 | 40                     | NR                 | NR                                                                                                 |
| Davis (2002) [49]              | N  | Y  | closed reduction using a bite block                                                                                                                                     | 3               | NA                                    | NA                                                                               | NA                                                                                                                     | NA                                                              | 42 | Y  | NR | NR                                                        | 36 | 33                     | NR                 | bilateral fibrous ankylosis                                                                        |
| Barron et al. (2002) [50]      | N  | Y  | closed manual reduction                                                                                                                                                 | immediate       | NA                                    | NA                                                                               | NA                                                                                                                     | NA                                                              | 7  | NR | NR | NR                                                        | 24 | 35                     | to the R           | NR                                                                                                 |
| Spanio et al. (2002) [51]      | N  | N  | open reduction with craniotomy and using a steel wire                                                                                                                   | 20              | coronal                               | temporalis muscle flap between the condyle and the roof of the articular cavity. | temporal bone graft                                                                                                    | N                                                               | NR | NR | NR | NR                                                        | 24 | 37                     | to the L           | NR                                                                                                 |
|                                | NR | NR | open manual reduction ?                                                                                                                                                 | 14              | preauricular                          | NA                                                                               | bone graft using the iliac crest stabilized by a titanium plate fixed to the zygomatic arch                            | N                                                               | NR | NR | NR | NR                                                        | 8  | NR                     | to the L           | NR                                                                                                 |
| van der Linden (2003) [52]     | NR | NR | open manual reduction                                                                                                                                                   | 21              | preauricular and temporal             | dissectomy                                                                       | temporal fascia graft                                                                                                  | N                                                               | 9  | Y  | NR | NR                                                        | 58 | 36                     | NR                 | atrophy and degeneration of the articular surfaces of the R condyle with a fibro-osseous ankylosis |
| Parthiban et al. (2004) [53]   | NR | Y  | open reduction with craniotomy by pushing the condyle from in the cranial fossa and pulling the mandible from outside                                                   | immediate       | temporal                              | placing a silastic sheet over the condylar head                                  | temporal bone graft                                                                                                    | N                                                               | 42 | NR | NR | NR                                                        | 4  | 32                     | to the L           | NR                                                                                                 |
| Nadal et al. (2005) [54]       | NR | NR | open reduction with craniotomy                                                                                                                                          | 7               | coronal and preauricular              | NA                                                                               | osteoartilaginous graft using the navicular bone                                                                       | N                                                               | NR | NR | NR | NR                                                        | 6  | adequate               | minimally to the L | NR                                                                                                 |
| Cillo et al. (2005) [55]       | NR | NR | open reduction with craniotomy with inferiorly directed force applied to the posterior mandible and inferior pressure placed on the condyle using a periosteal elevator | immediate       | extended preauricular                 | repositioning the disk and placing a sheet of Gelfilm                            | calvarial bone graft                                                                                                   | NR                                                              | 21 | NR | NR | NR                                                        | 6  | NR                     | to the R           | NR                                                                                                 |
| de Oliveira et al. (2005) [56] | NR | NR | open reduction, arthroplasty, and orthognathic surgery                                                                                                                  | 1,825 (5 years) | modified preauricular                 | arthroplasty by interpositioning of an ear cartilage autogenous graft            | ear cartilage autogenous graft among the osteotomized fragments                                                        | N                                                               | NR | Y  | NR | orthodontic treatment and subsequent orthognathic surgery | NR | normal                 | NR                 | NR                                                                                                 |
| Harshall et al. (2005) [57]    | N  | N  | closed manual reduction                                                                                                                                                 | NR              | closed                                | NA                                                                               | NA                                                                                                                     | N                                                               | 7  | NR | NR | orthodontic treatment                                     | 36 | 35                     | 4 mm to the R      | shorter mandibular ramus on the R side                                                             |
| Scares et al. (2005) [58]      | NR | NR | open manual reduction                                                                                                                                                   | NR              | open                                  | dissectomy                                                                       | temporalis muscle flap                                                                                                 | NR                                                              | NR | Y  | NR | NR                                                        | 9  | 38                     | N                  | NR                                                                                                 |
| Clauser et al. (2006) [59]     | N  | NR | open reduction with condylotomy                                                                                                                                         | 120             | submandibular and preauricular        | condylotomy by remodeling the bony surfaces using a rounded burr                 | temporalis muscle flap with inferior pedicle                                                                           | N                                                               | 14 | Y  | 1  | NR                                                        | 1  | 45                     | NR                 | NR                                                                                                 |
| Ohura et al. (2006) [60]       | N  | Y  | L, open reduction with craniotomy by pushing the condyle downward; R, conservative                                                                                      | 17              | first, temporal; second, preauricular | open reduction by pushing the condyle downward                                   | temporal fascial graft                                                                                                 | redislocation on the fourth postoperative (first operation) day | 21 | NR | NR | N                                                         | 24 | 42                     | NR                 | NR                                                                                                 |

|                                         |    |    |                                                                                                                                              |           |                                          |                                                                   |                                                                                                                |                    |    |    |    |                       |         |                 |                    |    |
|-----------------------------------------|----|----|----------------------------------------------------------------------------------------------------------------------------------------------|-----------|------------------------------------------|-------------------------------------------------------------------|----------------------------------------------------------------------------------------------------------------|--------------------|----|----|----|-----------------------|---------|-----------------|--------------------|----|
| Rosa et al. (2006) [61]                 | NA | NA | NA                                                                                                                                           | NA        | NA                                       | NA                                                                | NA                                                                                                             | N                  | NA | NA | NA | NR                    | NR      | NR              | NR                 | NR |
| Magge et al. (2007) [62]                | NR | NR | open reduction with craniotomy                                                                                                               | 1         | temporal                                 | reduction externally with traction                                | split-thickness skull graft                                                                                    | N                  | 28 | Y  | NR | NR                    | 12      | normal          | slightly to the R  | NR |
| Healy et al. (2008) [63]                | N  | Y  | closed manual reduction ?                                                                                                                    | 5         | NA                                       | NA                                                                | NA                                                                                                             | N                  | 42 | Y  | 12 | N                     | 12      | 35              | minimally to the L | NR |
| Taghialatela Scafati et al. (2008) [64] | N  | N  | open reduction with an anchor screw and condylectomy                                                                                         | 21        | preauricular                             | condylectomy with removal of few remnants of the disrupted disk   | autogenous bone graft using bone chips and temporal fascia                                                     | NR                 | NR | NR | NR | NR                    | 36      | good function   | N                  | NR |
| Menon & Sinha (2008) [65]               | Y  | Y  | open reduction with condylotomy                                                                                                              | 7         | preauricular                             | condylotomy with repositioning the remnants of the disk           | ear cartilage autogenous graft among the osteotomized fragments                                                | NR                 | 7  | NR | NR | NR                    | 6       | NR              | to the L           | NR |
| Lloyd & Sivarajasingam (2010) [66]      | NR | Y  | open reduction with craniotomy                                                                                                               | immediate | preauricular and temporal                | NA                                                                | NA                                                                                                             | supraglottic edema | 7  | Y  | 1  | NR                    | 12      | 30              | slightly to the L  | NR |
| Man et al. (2011) [67]                  | NR | Y  | open reduction by traction using Kocher forceps                                                                                              | 10        | submandibular and preauricular           | disk repositioning                                                | temporalis musculofascial flap and titanium network                                                            | NR                 | 14 | NR | NR | NR                    | 12      | restored        | NR                 | NR |
| Hayashi et al. (2011) [68]              | NR | NR | open reduction and reconstruction using a TMJ custom prosthesis                                                                              | NR        | retromandibular and endaural             | reconstruction using a TMJ custom prosthesis                      | reconstruction using a TMJ custom prosthesis                                                                   | NR                 | NR | NR | NR | NR                    | NR      | NR              | NR                 | NR |
| Struwer et al. (2012) [69]              | N  | NR | open reduction with front-temporal craniotomy, evacuation of the hematoma, osteosynthesis of the mandibular body and ramus and orbital floor | immediate | temporal                                 | NA                                                                | temporalis muscular flap                                                                                       | N                  | N  | NR | NR | NR                    | 6       | normal          | NR                 | NR |
| Yoshida & Hyo (2012) [70]               | N  | Y  | closed manual reduction                                                                                                                      | 3         | closed                                   | NA                                                                | NA                                                                                                             | N                  | N  | Y  | 1  | NR                    | 32      | 28              | to the L           | NR |
| Jiao et al. (2013) [71]                 | Y  | N  | elastic intermaxillary traction and fixation                                                                                                 | 3         | closed                                   | NA                                                                | NA                                                                                                             | N                  | 7  | Y  | NR | N                     | 24      | 35              | N                  | NR |
| García-Guevara et al. (2013) [72]       | N  | N  | reconstruction using a temporomandibular joint prosthesis after waiting for the bone segment consolidation                                   | 210       | preauricular and submandibular           | arthrotomy cut at the level of the sigmoid notch                  | reconstruction using a temporomandibular joint prosthesis (Biomet/Lorenz Microfixation TMJ Replacement System) | N                  | N  | Y  | 3  | N                     | 24      | 35              | NR                 | NR |
| Lee et al. (2013) [73]                  | N  | N  | open reduction with craniotomy, partial mandibulectomy, and condylectomy                                                                     | 10        | temporal, gingival-buccal, and transoral | partial mandibulectomy and condylectomy                           | deferred                                                                                                       | N                  | NR | NR | NR | N                     | 4       | without trismus | NR                 | NR |
| Tutela et al. (2013) [74]               | N  | Y  | closed manual reduction and external fixation                                                                                                | immediate | NA                                       | NA                                                                | N                                                                                                              | redislocation      | 16 | NR | NR | N                     | 15      | 37              | NR                 | NR |
| Zhang et al. (2014) [75]                | N  | NR | open manual reduction ?                                                                                                                      | NR        | semiconoral                              | repositioning and repair of the disk using a calvarial periosteum | repair using calvarial bone                                                                                    | N                  | NR | NR | NR | NR                    | 12      | 41              | NR                 | NR |
|                                         | N  | NR | open manual reduction ?                                                                                                                      | NR        | preauricular                             | closed reduction of the R condyle                                 | temporal musculofascial flap and titanium mesh                                                                 | N                  | NR | NR | NR | NR                    | 12      | 38              | NR                 | NR |
| Vaezi et al. (2014) [76]                | N  | Y  | open reduction with craniotomy using a periosteal elevator                                                                                   | NR        | preauricular                             | disk repositioning                                                | round-shaped miniplate                                                                                         | N                  | 21 | NR | NR | N                     | 6       | no complaint    | slightly to the R  | NR |
| Oberman et al. (2014) [77]              | N  | Y  | closed manual reduction                                                                                                                      | NR        | NA                                       | NA                                                                | NA                                                                                                             | N                  | 7  | NR | NR | NR                    | 37 days | NR              | NR                 | NR |
| Asai et al. (2014) [78]                 | N  | Y  | closed manual reduction                                                                                                                      | 2         | Closed                                   | NA                                                                | NA                                                                                                             | N                  | Y  | Y  | NR | N                     | 8       | 38              | 5 mm to the R      | NR |
| He et al. (2015) [79]                   | Y  | Y  | closed manual reduction                                                                                                                      | 5         | NA                                       | NA                                                                | NA                                                                                                             | N                  | 30 | Y  | NR | orthodontic treatment | 12      | 38              | to the R           | NR |

|                                |    |    |                                                                                                                              |                 |                                           |                                                                                                                                 |                                                                                                 |               |    |    |    |                                              |    |            |          |                                            |
|--------------------------------|----|----|------------------------------------------------------------------------------------------------------------------------------|-----------------|-------------------------------------------|---------------------------------------------------------------------------------------------------------------------------------|-------------------------------------------------------------------------------------------------|---------------|----|----|----|----------------------------------------------|----|------------|----------|--------------------------------------------|
|                                | N  | NR | open reduction with craniotomy                                                                                               | 14              | preauricular and coronal                  | reduction with intermaxillary screw drilled into the condyle and temporalis muscle graft                                        | temporal bone graft fixed using a titanium miniplate                                            | N             | 30 | NR | NR | N                                            | 12 | 36         | to the R | NR                                         |
|                                | N  | N  | open reduction with craniotomy using a towel clamp and osteosynthesis of the mandibular body                                 | 150             | preauricular and coronal                  | reduction using a towel clamp                                                                                                   | temporal bone graft fixed using titanium plate                                                  | N             | 30 | NR | NR | N                                            | 12 | 35         | to the R | NR                                         |
| Temiz et al. (2015) [80]       | N  | Y  | closed manual reduction                                                                                                      | within 16 hours | NA                                        | NA                                                                                                                              | NA                                                                                              | N             | 14 | Y  | NR | N                                            | 6  | 32         | N        | N                                          |
|                                | N  | Y  | open manual reduction                                                                                                        | 21              | preauricular                              | removal of fibrotic tissues and callus incision of the joint capsule to confirm the position of the condyle                     | NA                                                                                              | N             | Y  | Y  | NR | N                                            | 12 | 35         | to the R | N                                          |
| Zhang et al. (2016) [81]       | N  | NR | open reduction using a Kocher clamp                                                                                          | 1               | gingival labial and preauricular          | placement of Duragen to repair the skull base defect                                                                            |                                                                                                 | N             | Y  | NR | NR | N                                            | NR | NR         | NR       | NR                                         |
| Arya & Chigurupati (2016) [82] | NR | Y  | closed manual reduction                                                                                                      | NR              | NA                                        | NA                                                                                                                              | NA                                                                                              | NR            | Y  | NR | NR | NR                                           | NR | NR         | NR       | NR                                         |
|                                | NR | Y  | closed manual reduction                                                                                                      | NR              | NA                                        | NA                                                                                                                              | NA                                                                                              | NR            | NR | NR | NR | NR                                           | NR | NR         | NR       | morphologic changes of the L condylar head |
| Kanno et al. (2016) [83]       | N  | N  | open reduction with craniotomy by extraoral mandibular traction                                                              | 3               | coronal                                   | removal of small fragments around the fractured roof of the glenoid fossa                                                       | cranial base reconstruction using a round-shaped miniplate                                      | N             | 28 | NR | NR | N                                            | 18 | 35         | NR       | N                                          |
| Zamorano et al. (2016) [84]    | N  | N  | open reduction with craniotomy, R condylectomy, and bilateral coronoidectomy                                                 | 1,095           | temporal, preauricular, and intraoral     | R condylectomy, bilateral coronoidectomy                                                                                        | temporalis muscle flap                                                                          | NR            | NR | Y  | NR | necessary orthodontic and surgical treatment | 12 | 40         | N        | micrognathia                               |
| Rikhotso & Bobat (2016) [85]   | N  | N  | bilateral arthroplasty accompanied by total joint replacement                                                                | 365             | bilateral preauricular                    | arthroplasty cut at the level of the sigmoid notch for removal of the extracranial ankylosed fragment of the dislocated condyle | bilateral total joint replacement using a Biomet Microfixation TMJ stock replacement system     | NR            | NR | Y  | 3  | NR                                           | 36 | 35         | N        | NR                                         |
| Pinares & Urzúa (2016) [86]    | N  | NA | NA                                                                                                                           | NA              | NA                                        | NA                                                                                                                              | NA                                                                                              | N             | NA | NR | NR | NR                                           | NR | NR         | NR       | NR                                         |
| Yadegari et al. (2016) [87]    | N  | Y  | closed manual reduction                                                                                                      | 0               | closed                                    | NA                                                                                                                              | NA                                                                                              | redislocation | N  | Y  | 4  | NR                                           | 36 | 25         | N        | NR                                         |
| Lindell & Thor (2017) [88]     | N  | Y  | first, closed manual reduction, reduction of symphysis fracture; second, arthroplasty accompanied by total joint replacement | 0               | preauricular and retromandibular          | resection of the condylar head and coronoid process with custom-made cutting guide                                              | L total joint replacement using a custom-made alloplastic TMJ prosthesis (Biomet Microfixation) | NR            | 14 | Y  | NR | NR                                           | 84 | 44         | NR       | NR                                         |
| De Mol et al. (2017) [89]      | NA | NA | conservative                                                                                                                 | NA              | NA                                        | NA                                                                                                                              | NA                                                                                              | N             | NA | NA | NA | N                                            | NR | NR         | NR       | NR                                         |
| Liu et al. (2017) [90]         | Y  | Y  | open reduction with gap arthroplasty                                                                                         | 35              | submandibular and preauricular            | L gap arthroplasty and osteotomy between the neck of the L condyle and the sigmoid notch                                        | temporalis fascial flap                                                                         | NR            | 15 | NR | NR | N                                            | 6  | 30         | to the L | NR                                         |
| Kurimori et al. (2018) [91]    | N  | N  | open reduction with craniotomy and internal fixation of the L condylar and parasymphysis                                     | 8               | temporal, preauricular, and submandibular | open reduction using a steel wire                                                                                               | temporalis muscle flap                                                                          | NR            | 14 | NR | NR | orthodontic treatment                        | 36 | NR         | NR       | L TMJ pain and click                       |
|                                | N  | N  | open reduction with gap arthroplasty and coronoidectomy                                                                      | 2,190           | preauricular                              | subcondylar osteotomy and interposing a Silastic sheet                                                                          | NA                                                                                              | N             | NR | NR | NR | NR                                           | 36 | acceptable | NR       | NR                                         |

|                                           |    |    |                                                                             |    |                              |                                                                                               |                                                                               |                                                                                                |    |    |    |                       |     |                |          |                                                                                                                                                      |
|-------------------------------------------|----|----|-----------------------------------------------------------------------------|----|------------------------------|-----------------------------------------------------------------------------------------------|-------------------------------------------------------------------------------|------------------------------------------------------------------------------------------------|----|----|----|-----------------------|-----|----------------|----------|------------------------------------------------------------------------------------------------------------------------------------------------------|
| Monteiro et al. (2019) [92]               | N  | N  | open manual reduction with craniotomy                                       | 20 | temporal                     | removal of the bone in the medial and anterior aspect to the condyle using a Kerrison rongeur | temporal bone graft fixed using short titanium screws                         | vomiting, intense headache, and extravasation of the CSF through the R external auditory canal | Y  | NR | NR | NR                    | 5   | 22             | NR       | a discrete peripheral facial nerve deficit and diminished hearing on the R side                                                                      |
| Liau et al. (2019) [93]                   | N  | N  | open reduction with traction                                                | NR | preauricular                 | disk repositioning                                                                            | the temporal bone fragment located and repositioned under endoscopic guidance | N                                                                                              | NR | Y  | NR | NR                    | 15  | normal         | NR       | NR                                                                                                                                                   |
| Holz et al. (2019) [94]                   | NA | NA | NA                                                                          | NA | NA                           | NA                                                                                            | NA                                                                            | NA                                                                                             | NA | NA | NA | NA                    | NA  | NA             | NA       | died after arrival at hospital                                                                                                                       |
|                                           | NA | NA | NA                                                                          | NA | NA                           | NA                                                                                            | NA                                                                            | NA                                                                                             | NA | NA | NA | NA                    | NA  | NA             | NA       | found in corpse                                                                                                                                      |
| Chen et al. (2019) [95]                   | N  | Y  | open reduction with R condylectomy and coronoidectomy                       | 17 | intraoral                    | osteotomy at the condylar neck                                                                | NA                                                                            | N                                                                                              | 7  | Y  | 3  | NR                    | 96  | 50             | to the R | NR                                                                                                                                                   |
| Esquenazi et al. (2019) [96]              | N  | N  | open reduction with craniotomy                                              | 0  | preauricular and hemiconchal | open reduction                                                                                | temporal musculofascial flap repaired using titanium mesh                     | N                                                                                              | Y  | NR | NR | NR                    | NR  | NR             | NR       | NR                                                                                                                                                   |
| Kyrpa et al. (2019) [97]                  | NR | NR | open reduction with craniotomy                                              | 2  | temporal                     | removal of temporal bone fragments                                                            | temporal bone graft                                                           | N                                                                                              | NR | NR | NR | NR                    | NR  | NR             | NR       | NR                                                                                                                                                   |
| Romano et al. (2019) [98]                 | N  | NR | open reduction with craniotomy and fixation of multiple skull base fracture | 0  | NR                           | open reduction                                                                                | temporalis muscle flap                                                        | hearing deficit associated with facial nerve paralysis                                         | NR | NR | NR | N                     | 12  | NR             | slight   | NR                                                                                                                                                   |
| Congusta & Champion (2020) [99]           | NA | NA | closed manual reduction                                                     | NR | NA                           | NA                                                                                            | NA                                                                            | NR                                                                                             | Y  | NR | NR | NR                    | 75  | 42             | N        | marked erosive bony changes, decreased joint space, and persistent dehiscence of the bony glenoid fossa                                              |
| Ramani et al. (2021) [100]                | NA | NA | closed manual reduction                                                     | NA | NA                           | NA                                                                                            | NA                                                                            | NR                                                                                             | 14 | Y  | 2  | N                     | 120 | 25             | N        | remodeling with thick sclerotic bone in the lateral and posterior aspect of the L condyle; anterior disk displacement without reduction in the R TMJ |
| Díez-Suárez & Paredes-Fanera (2021) [101] | Y  | Y  | open reduction with craniotomy and condylotomy                              | 7  | preauricular and temporal    | removal of the unstable segment of the diacapitular fracture and condylar remodeling          | reconstruction using a resorbable mesh and temporalis muscle flap             | NR                                                                                             | NR | Y  | 14 | orthodontic treatment | 12  | 40             | to the L | persistent mandibular deviation                                                                                                                      |
| Zumbrunn Wojczyńska et al. (2021) [102]   | NA | NA | conservative                                                                | NA | NA                           | NA                                                                                            | NA                                                                            | N                                                                                              | NA | NA | NA | N                     | 12  | no progression | NR       | NR                                                                                                                                                   |
| Motazedian et al. (2021) [103]            | NA | NA | conservative                                                                | NA | NA                           | NA                                                                                            | NA                                                                            | N                                                                                              | NA | NA | NA | N                     | NR  | NR             | NR       | NR                                                                                                                                                   |
| D'Hondt et al. (2022) [104]               | NA | NR | subcondylar osteotomy and mandibular debridement                            | 90 | NR                           | mandibular debridement                                                                        | temporal fascia flap                                                          | development of the L facial nerve paresis                                                      | NR | NR | NR | N                     | 12  | 30             | to the L | NR                                                                                                                                                   |

Y, yes; N, no; NR, not reported; NA, not applicable; L, left; R, right; TMJ, temporomandibular joint; CSK, cerebrospinal fluid.
