# Supplementary material for: Superior Dislocation of the Mandibular Condyle into the Middle Cranial Fossa: A Comprehensive Review of the Literature
Source: MDPI journal article supplement (doi:10.3390/jcm12113781), 2023-05-31
Supplement: s1 [file s1]

Table S1. Summary of demographic data and symptoms

| Author/Year of publication        | Age | Sex | Side | Etiology                     | Chief complaint                                                                                                                  | Diagnostic imaging | Method of diagnosis                  | Total intrusion | Delay to diagnosis (days) | Maximal mouth opening (mm)                   | Deviation       | Open bite | Loss of consciousness | Otorrhagia | Hearing loss | Intracranial hematoma | Dural tear   | CSK leak | Other symptoms                                                                            | Orofacial fracture                          | Other fracture                       |
|-----------------------------------|-----|-----|------|------------------------------|----------------------------------------------------------------------------------------------------------------------------------|--------------------|--------------------------------------|-----------------|---------------------------|----------------------------------------------|-----------------|-----------|-----------------------|------------|--------------|-----------------------|--------------|----------|-------------------------------------------------------------------------------------------|---------------------------------------------|--------------------------------------|
| Lefevre de Rochefort (1834) [1]   | 22  | M   | R    | fall after drinking alcohol  | inability to open the mouth and R TMJ pain                                                                                       | N                  | autopsy                              | NA              | 160?                      | 0                                            | posterior and L | N         | NR                    | Y          | N            | NR                    | tom          | NR       | contusion of the chin and headache                                                        | R condylar neck                             | N                                    |
| Heidsieck (1960) [2]              | 38  | M   | L    | MVA                          | NR                                                                                                                               | radiography        | radiography                          | NA              | 56                        | NR                                           | to the L        | NR        | NR                    | NR         | Y            | NR                    | NR           | NR       | cerebral contusion, facial nerve paralysis, and facial laceration                         | L zygoma                                    | skull base and L clavicle            |
| Dingman & Grabb (1963) [3]        | 28  | W   | R    | MVA                          | NR                                                                                                                               | NR                 | NR                                   | NA              | immediate                 | NR                                           | NR              | NR        | NR                    | NR         | NR           | NR                    | NR           | NR       | cerebral concussion                                                                       | NR                                          | NR                                   |
| Doane (1963) [4]                  | 13  | W   | R    | MVA                          | mandibular deviation, laceration of the chin, and inability to open the mouth                                                    | radiography        | radiography                          | Y               | 7?                        | 6                                            | to the R        | NR        | Y                     | N          | N            | N                     | intact       | N        | retrograde amnesia, cerebral concussion, drowsiness, and vomiting                         | N                                           | fourth and fifth ribs                |
| Steinhäuser (1964) [5]            | 26  | W   | R    | bicycle accident             | limited mouth opening and R TMJ pain                                                                                             | radiography        | tomography                           | N               | 7                         | 13                                           | NR              | anterior  | N                     | N          | N            | NR                    | NR           | N        | teeth fracture                                                                            | N                                           | N                                    |
| Peltier & Matthews (1965) [6]     | 18  | W   | R    | MVA                          | forehead laceration and mandibular fracture with lateral displacement                                                            | radiography        | radiography                          | Y               | immediate                 | NR                                           | to the R        | NR        | N                     | Y          | N            | N                     | intact       | N        | mild facial nerve paralysis                                                               | R mental area                               | N                                    |
| Stoltmann (1965) [7]              | 25  | M   | R    | MVA                          | inability to open the mouth, malocclusion, and deviation                                                                         | radiography        | radiography                          | NA              | immediate                 | NR                                           | to the R        | NR        | Y                     | NR         | NR           | NR                    | a small rent | NR       | amnesia                                                                                   | N                                           | N                                    |
|                                   | 25  | M   | L    | MVA                          | malocclusion and inability to move the jaw                                                                                       | radiography        | radiography                          | Y               | immediate                 | NR                                           | NR              | NR        | NR                    | NR         | Y            | NR                    | intact       | NR       | paresis on the L facial nerve and amnesia                                                 | N                                           | N                                    |
| Cernéa et al. (1965) [8]          | 13  | M   | R    | bicycle accident             | limited mouth opening                                                                                                            | radiography        | tomography                           | NA              | 730 (2 years)             | 13                                           | 10 mm to the R  | NR        | N                     | N          | N            | NR                    | NR           | N        | pain in the mental region                                                                 | N                                           | N                                    |
| Dedhaume et al. (1965) [9]        | 33  | M   | L    | assault                      | pain in the L temporal region                                                                                                    | radiography        | tomography                           | NA              | 4                         | 5                                            | to the L        | NR        | NR                    | NR         | Y            | NR                    | NR           | NR       | N                                                                                         | N                                           | N                                    |
| Whitacre (1965) [10]              | 15  | W   | L    | MVA                          | inability to open the mouth and L preauricular pain                                                                              | radiography        | panogram of the TMJ                  | Y               | 10                        | NR                                           | to the L        | NR        | NR                    | NR         | NR           | NR                    | intact       | NR       | NR                                                                                        | N                                           | N                                    |
| Brons (1967) [11]                 | 40  | W   | L    | NR                           | pain in the L ear region and masticatory disturbance                                                                             | radiography        | tomography                           | N               | 56                        | NR                                           | to the L        | Y         | Y                     | N          | N            | NR                    | NR           | N        | vomiting and retrograde amnesia                                                           | N                                           | N                                    |
| Rowe & Killey (1968) [12]         | 50  | M   | R    | MVA                          | inability to move the jaw                                                                                                        | radiography        | radiography                          | Y               | immediate                 | NR                                           | to the R        | Y         | Y                     | NR         | N            | NR                    | intact       | NR       | N                                                                                         | N                                           | R femur                              |
| Pirok & Merrill (1970) [13]       | 19  | M   | R    | industrial accident          | mandibular fracture and laceration, severing the facial vessels and injuring the marginal mandibular branch of the seventh nerve | radiography        | laminogram of the mandibular condyle | N               | 63                        | NR                                           | to the R        | NR        | N                     | N          | Y            | N                     | NR           | N        | displacement of the molars                                                                | R angle and maxillary alveolar              | N                                    |
| Lund (1971) [14]                  | 56  | W   | R    | MVA                          | limited mouth opening                                                                                                            | radiography        | tomography                           | N               | 244                       | 40 mm between the edentulous alveolar ridges | to the L        | NR        | Y                     | NR         | NR           | NR                    | NR           | NR       | cerebral contusion                                                                        | L condyle                                   | ribs, pelvis, and limbs              |
| Seymour & Irbly (1976) [15]       | 64  | M   | L    | fall from a moving truck     | limited jaw movement                                                                                                             | radiography        | tomography                           | Y               | 3                         | NR                                           | to the L        | NR        | Y                     | N          | Y            | NR                    | NR           | NR       | bilateral paralysis of the seventh cranial nerve and L paresis of the sixth cranial nerve | L condyle                                   | basilar skull                        |
| Pons et al. (1976) [16]           | 26  | M   | R    | MVA                          | limited mouth opening                                                                                                            | radiography        | tomography                           | Y               | several weeks             | 15                                           | to the R        | NR        | Y                     | NR         | NR           | NR                    | intact       | NR       | damage to the diaphragm and spleen                                                        | L condyle and R symphysis                   | L femur, Rastragalus, and L clavicle |
| Kallal et al. (1977) [17]         | 15  | W   | R    | bicycle accident             | inability to move jaw                                                                                                            | radiography        | tomography                           | Y               | immediate                 | NR                                           | to the R        | anterior  | N                     | N          | N            | N                     | NR           | N        | chin laceration                                                                           | L condyle                                   | N                                    |
| Zecha (1977) [18]                 | 25  | W   | R    | bicycle accident             | R periauricular pain and inability to close the mouth                                                                            | radiography        | tomography                           | N               | immediate                 | 2                                            | to the R        | Y         | N                     | Y          | N            | N                     | NR           | N        | chin laceration                                                                           | L condyle and symphysis                     | N                                    |
| Schneller (1979) [19]             | 14  | W   | R    | MVA                          | malocclusion                                                                                                                     | radiography        | tomography                           | N               | 10                        | NR                                           | NR              | anterior  | N                     | N          | N            | NR                    | NR           | NR       | paresthesia in the R cheek                                                                | N                                           | R fibular head                       |
| Iannetti & Martucci (1980) [20]   | 38  | M   | N    | fall due to epileptic attack | lacerated and contused wound of the symphysis                                                                                    | radiography        | radiography                          | N               | immediate                 | NR                                           | NR              | NR        | NR                    | N          | N            | NR                    | NR           | NR       | N                                                                                         | N                                           | N                                    |
| Pieritz & Schmidseder (1981) [21] | 18  | M   | R    | MVA                          | displaced mandibular fracture                                                                                                    | radiography        | radiography                          | Y               | 10                        | NR                                           | NR              | anterior  | Y                     | NR         | Y            | NR                    | NR           | NR       | paresis of the R facial nerve and cerebral contusion                                      | L canine region and R petrous temporal bone | N                                    |
| Lachard et al. (1981) [22]        | 17  | W   | R    | assault                      | pain during mouth opening and limited mouth opening                                                                              | radiography        | tomography                           | N               | NR                        | 0                                            | to the R        | N         | N                     | N          | N            | NR                    | NR           | N        | tinnitus                                                                                  | N                                           | N                                    |
|                                   | 18  | M   | R    | MVA                          | pain during jaw movements                                                                                                        | radiography        | tomography                           | NA              | 90                        | 15                                           | to the R        | NR        | Y                     | NR         | N            | NR                    | NR           | N        | head injury                                                                               | R condyle and symphysis                     | NR                                   |

|                                 |    |   |   |                                   |                                                                                     |                    |                            |    |           |          |                |                |    |    |    |                                 |        |    |                                                                                       |                                      |                                                                         |   |
|---------------------------------|----|---|---|-----------------------------------|-------------------------------------------------------------------------------------|--------------------|----------------------------|----|-----------|----------|----------------|----------------|----|----|----|---------------------------------|--------|----|---------------------------------------------------------------------------------------|--------------------------------------|-------------------------------------------------------------------------|---|
|                                 | 41 | M | R | NR                                | limited mouth opening                                                               | NR                 | NR                         | NA | 1 year    | 13       | NR             | NR             | NR | NR | NR | NR                              | NR     | NR | face injury                                                                           | NR                                   | NR                                                                      |   |
| Ihalainen & Tasanen (1983) [23] | 11 | W | R | bicycle accident                  | R TMJ pain                                                                          | arthopantomography | orthopantomography         | N  | immediate | 2        | 10 mm to the R | 20 mm anterior | N  | Y  | N  | N                               | NR     | N  | hemorrhage in the R middle ear                                                        | N                                    | N                                                                       |   |
| Metzner et al. (1984) [24]      | 26 | W | R | fall after drinking alcohol       | NA                                                                                  | NA                 | autopsy                    | N  | NR        | NA       | NA             | NA             | N  | N  | N  | epidural hemorrhage             | tom    | NR | chin laceration and vomiting                                                          | N                                    | N                                                                       |   |
| Pepper & Zide (1985) [25]       | 32 | W | R | MVA                               | inability to open the mouth, headache, and Rear pain                                | radiography        | tomography and CT          | N  | 1         | NR       | to the R       | NR             | N  | N  | N  | N                               | intact | N  | chin laceration and facial soreness                                                   | R condyle                            | N                                                                       |   |
| Copenhaver et al. (1985) [26]   | 9  | W | R | bicycle accident                  | limited mouth opening and pain in the R temporal area                               | radiography and CT | tomography and CT          | Y  | 2         | NR       | to the R       | NR             | N  | N  | N  | temporal lobe hematoma          | NR     | N  | laceration at the inferior symphysis                                                  | N                                    | N                                                                       |   |
| Rappaport et al. (1986) [27]    | 17 | W | R | MVA                               | mandibular parasymphysal fracture                                                   | radiography        | polydirectional tomography | N  | immediate | NR       | NR             | NR             | NR | Y  | NR | epidural and subdural hematomas | NR     | Y  | R facial nerve paralysis                                                              | L parasymphysis and R zygomatic arch | R frontal and basilar skull and extremity                               |   |
| Musgrove (1986) [28]            | 7  | W | L | bicycle accident                  | limited mouth opening                                                               | radiography        | tomography                 | N  | immediate | 3        | to the L       | anterior       | N  | N  | N  | N                               | NR     | N  | nausea                                                                                | N                                    | N                                                                       |   |
| Masaki et al. (1988) [29]       | 38 | W | L | MVA                               | limited mouth opening                                                               | radiography        | tomography                 | NR | 14        | 5        | NR             | NR             | N  | Y  | N  | N                               | NR     | N  | N                                                                                     | mandibular body                      | N                                                                       |   |
| Paulette et al. (1989) [30]     | 11 | W | L | bicycle accident                  | inability to move the mouth                                                         | radiography and CT | tomography and CT          | Y  | 5         | 5        | to the L       | R posterior    | N  | N  | Y  | N                               | NR     | N  | N                                                                                     | N                                    | N                                                                       |   |
| Christiansen (1989) [31]        | 9  | M | R | three-wheeler accident            | R TMJ pain                                                                          | radiography        | tomography                 | N  | NR        | 20       | to the L       | NR             | N  | N  | N  | Y                               | NR     | N  | chin laceration, headache, and fracture of teeth                                      | N                                    | N                                                                       |   |
|                                 | 35 | W | R | MVA                               | severe pain on the R side                                                           | radiography        | tomography                 | N  | 180       | 30       | to the L       | NR             | NR | NR | Y  | NR                              | NR     | NR | dizziness, constant headaches, and depression                                         | N                                    | N                                                                       |   |
| Baldwin (1990) [32]             | 10 | M | R | collision during football         | mandibular deviation and restricted jaw movement                                    | radiography        | tomography                 | N  | immediate | 5        | 8 mm to the R  | posterior      | N  | N  | N  | N                               | NR     | N  | vomiting                                                                              | N                                    | N                                                                       |   |
| Kamiya et al. (1990) [33]       | 21 | M | L | MVA                               | malocclusion                                                                        | radiography and CT | CT                         | Y  | 1         | 10       | 3 mm to the L  | anterior       | NR | N  | N  | subdural hematoma               | tom    | NR | chin laceration                                                                       | L condylar head                      | N                                                                       |   |
| Galito et al. (1991) [34]       | 33 | W | R | MVA                               | inability to move the mouth, R preauricular pain, and malocclusion                  | radiography and CT | CT                         | Y  | NR        | NR       | NR             | anterior       | NR | Y  | N  | Y                               | NR     | NR | N                                                                                     | R condyle and symphysis              | lower extremities                                                       |   |
| Marker (1992) [35]              | 8  | W | R | bicycle accident                  | R TMJ pain                                                                          | radiography        | tomography                 | N  | immediate | NR       | to the R       | Y              | N  | N  | N  | N                               | NR     | N  | chin laceration                                                                       | N                                    | N                                                                       |   |
| Engvall & Fischer (1992) [36]   | 37 | W | L | MVA                               | limited mouth opening                                                               | radiography and CT | tomography and CT          | Y  | 14        | impaired | NR             | anterior       | Y  | N  | N  | N                               | NR     | N  | sensory loss on the L mandible                                                        | R condyle and symphysis              | N                                                                       |   |
| Hamamoto et al. (1992) [37]     | 24 | W | L | MVA                               | inability to move the jaw                                                           | radiography        | tomography                 | N  | 1         | NR       | to the L       | NR             | Y  | N  | N  | N                               | NR     | N  | L preauricular swelling and tenderness                                                | N                                    | N                                                                       |   |
| Chuong (1994) [38]              | 28 | W | R | MVA                               | R preauricular pain and difficulty to move the mandible                             | radiography and CT | CT                         | N  | immediate | 7        | to the R       | anterior       | N  | Y  | Y  | N                               | NR     | N  | laceration of the cheek and L mandibular symphysis region                             | N                                    | N                                                                       |   |
| Dahlberg et al. (1995) [39]     | 11 | W | R | bicycle accident                  | R TMJ pain on jaw movement                                                          | radiography and CT | CT                         | N  | 1         | reduced  | NR             | Y              | N  | N  | N  | epidural hematoma               | intact | N  | cerebral concussion, headache, nausea, and drowsiness                                 | N                                    | N                                                                       |   |
| Tomes & Lind (1995) [40]        | 37 | W | R | MVA                               | mandibular asymmetry and reduced mouth opening                                      | radiography and CT | CT                         | Y  | 14        | 10       | to the R       | NR             | NR | NR | Y  | NR                              | NR     | NR | cerebral contusion, multiple lacerations, and teeth fracture                          | N                                    | N                                                                       |   |
| Sandler et al. (1996) [41]      | 16 | M | R | MVA                               | intracranial injury and cerebrospinal fluid leak from the Rear                      | CT                 | CT                         | Y  | immediate | NR       | to the R       | anterior       | Y  | Y  | NR | NR                              | tom    | Y  | pulmonary edema and coagulopathy, contusion of the inferior gyri of the temporal lobe | N                                    | N                                                                       |   |
| Ide et al. (1996) [42]          | 60 | M | L | fall due to loss of consciousness | malocclusion                                                                        | radiography and CT | CT                         | N  | immediate | 15       | NR             | Y              | Y  | N  | N  | NR                              | NR     | N  | pneumoencephalopathy and chin laceration                                              | L condyle                            | N                                                                       |   |
| Long et al. (1997) [43]         | 38 | W | L | MVA                               | headache, reduced visual acuity in the L eye, and difficulty in mandibular movement | radiography and CT | tomography and CT          | Y  | 15        | 8        | to the L       | anterior       | N  | Y  | N  | N                               | NR     | N  | N                                                                                     | N                                    | R temporoparietal bone                                                  |   |
| Benech et al. (1997) [44]       | 22 | M | L | MVA                               | lacerations in the neck, L preauricular region, and gums                            | radiography and CT | CT                         | N  | NR        | NR       | Y              | Y              | Y  | Y  | Y  | Y                               | NR     | NR | Y                                                                                     | N                                    | R body and L angle                                                      | N |
| Melugin et al. (1997) [45]      | 37 | W | L | MVA                               | L preauricular pain and limited mouth opening                                       | radiography and CT | CT                         | N  | 77        | 10       | to the L       | anterior       | NR | NR | Y  | NR                              | NR     | NR | L facial nerve paresis                                                                | R parasymphysis and L ramus          | basilar skull, L temporal bone, orbital floor, and orthopedic fractures |   |
| Koretsch et al. (2001) [46]     | 6  | W | L | MVA                               | inability to move the jaw                                                           | radiography and CT | 3DCT                       | N  | 1         | 13       | to the L       | anterior       | N  | N  | N  | subarachnoid hemorrhage         | NR     | N  | L auricular pain and temporal lobe contusion                                          | N                                    | N                                                                       |   |
| DeFabianis (2001) [47]          | 6  | W | L | fall while playing                | limited mouth opening                                                               | radiography and CT | CT                         | Y  | 210       | 21       | to the L       | anterior       | N  | N  | N  | N                               | NR     | N  | laceration at the inferior symphysis                                                  | N                                    | N                                                                       |   |
| Hayashi et al. (2001) [48]      | 19 | W | R | MVA                               | limited mouth opening                                                               | CT and radiography | CT and 3DCT                | Y  | immediate | 15       | to the R       | slight         | N  | N  | N  | NR                              | NR     | N  | facial paralysis and pneumoencephalopathy                                             | R condyle                            | N                                                                       |   |
| Davis (2002) [49]               | 23 | W | L | fall due to stumbling             | sore chin and odynophagia                                                           | radiography and CT | CT                         | Y  | 3         | NR       | NR             | anterior       | N  | N  | N  | NR                              | NR     | N  | L TMJ tenderness and contusion of the temporal lobe                                   | R glenoid fossa                      | N                                                                       |   |
| Barron et al. (2002) [50]       | 8  | W | R | bicycle accident                  | difficulty to move the jaw and mandibular deviation                                 | radiography and CT | CT                         | N  | immediate | NR       | to the R       | NR             | N  | N  | N  | N                               | NR     | N  | laceration at the submental area                                                      | N                                    | N                                                                       |   |

|                                         |    |   |     |                                   |                                                                                                            |                          |                   |              |                 |                  |                |                             |    |    |    |                             |                  |    |                                                                                                         |                                            |                                                                          |
|-----------------------------------------|----|---|-----|-----------------------------------|------------------------------------------------------------------------------------------------------------|--------------------------|-------------------|--------------|-----------------|------------------|----------------|-----------------------------|----|----|----|-----------------------------|------------------|----|---------------------------------------------------------------------------------------------------------|--------------------------------------------|--------------------------------------------------------------------------|
| Spanio et al. (2002) [51]               | 57 | M | L   | MVA                               | L TMJ pain                                                                                                 | radiography and CT       | CT                | Y            | immediate       | 15               | to the L       | NR                          | N  | N  | N  | N                           | intact           | N  | injury in the mandibular symphysis                                                                      | N                                          | N                                                                        |
|                                         | 10 | W | L   | bicycle accident                  | L preauricular pain                                                                                        | radiography and CT       | CT                | Y            | 5               | 10               | NR             | Y                           | N  | N  | N  | N                           | NR               | N  | chin laceration                                                                                         | N                                          | N                                                                        |
| van der Linden (2003) [52]              | 17 | M | R   | MVA                               | R preauricular pain and limited mouth opening                                                              | radiography and CT       | tomography and CT | Y            | 2?              | 3                | to the R       | NR                          | N  | N  | N  | N                           | intact           | N  | chin laceration                                                                                         | N                                          | orthopedic fractures                                                     |
| Parthiban et al. (2004) [53]            | 19 | M | L   | MVA                               | limited mandibular movement                                                                                | CT                       | CT                | Y            | immediate       | NR               | NR             | posterior                   | NR | NR | NR | basal extradural hematoma   | lacerated        | NR | cut injury on the forehead and cortical contusion                                                       | N                                          | N                                                                        |
| Nadal et al. (2005) [54]                | 17 | W | L   | fall due to loss of consciousness | L TMJ pain and limited mouth opening                                                                       | radiography and CT       | CT                | Y            | immediate       | 6                | to the L       | anterior                    | Y  | N  | N  | N                           | injured          | Y  | N                                                                                                       | N                                          | N                                                                        |
| Gillo et al. (2005) [55]                | 7  | M | R   | MVA                               | R jaw pain, limited mouth opening, and malocclusion                                                        | radiography and CT       | CT                | Y            | immediate       | NR               | to the R       | anterior                    | N  | N  | N  | N                           | tom              | N  | luxation of the R maxillary central incisor                                                             | N                                          | N                                                                        |
| de Oliveira et al. (2005) [56]          | 12 | W | R   | accidental fall                   | mandibular hypomobility                                                                                    | radiography and CT       | tomography and CT | Y            | 1,825 (5 years) | 16               | NR             | NR                          | N  | N  | N  | N                           | NR               | N  | TMJ ankylosis                                                                                           | N                                          | N                                                                        |
| Harstall et al. (2005) [57]             | 9  | W | R   | fall from a climbing pole         | inability to close the mouth                                                                               | CT                       | CT                | Y            | immediate       | 9                | 10 mm to the R | anterior                    | N  | N  | N  | N                           | NR               | N  | pneumoencephalopathy                                                                                    | N                                          | N                                                                        |
| Soares et al. (2005) [58]               | 36 | W | L   | MVA                               | headache, malocclusion, and limited mouth opening                                                          | panorex and CT           | CT                | NA           | 7               | 9                | to the L       | posterior                   | N  | N  | N  | N                           | N                | N  | NR                                                                                                      | NA                                         | NR                                                                       |
| Clauser et al. (2006) [59]              | 32 | W | L   | MVA                               | mandibular asymmetry with malocclusion and reduced mouth opening                                           | CT and MRI               | CT and MRI        | Y            | 120             | 18               | to the L       | anterior                    | N  | N  | N  | N                           | NR               | N  | occlusal impairment                                                                                     | N                                          | multiple bone fractures                                                  |
| Ohura et al. (2006) [60]                | 23 | W | L/R | fall due to loss of consciousness | bilateral preauricular pain, difficulty to move the mandible, anterior open bite, and asymmetric occlusion | radiography, CT, and MRI | 3DCT              | L: Y<br>R: N | a few days?     | NR               | to the L       | 7 mm anterior               | Y  | N  | N  | bilateral epidural hematoma | intact           | N  | L facial nerve paralysis and intracranial pneumatocele                                                  | R condyle                                  | N                                                                        |
| Rosa et al. (2006) [61]                 | 5  | W | R   | MVA                               | facial asymmetry and preauricular pain                                                                     | CT and MRI               | 3DCT and MRI      | Y?           | 730 (2 years)   | 10               | to the R       | 5 mm anterior               | N  | N  | N  | N                           | NR               | N  | facial trauma                                                                                           | N                                          | N                                                                        |
| Magge et al. (2007) [62]                | 12 | W | R   | collision with another child      | headache and inability to occlude the teeth                                                                | CT                       | CT                | Y            | 1               | 10               | to the R       | L posterior                 | N  | N  | N  | N                           | tom              | N  | edema in the brain                                                                                      | N                                          | N                                                                        |
| Healy et al. (2008) [63]                | 43 | W | L   | MVA                               | open bite, malocclusion, and inability to open the mouth                                                   | CT                       | CT                | N            | 5               | NR               | to the L       | anterior                    | N  | Y  | N  | N                           | NR               | N  | facial abrasions                                                                                        | L condyle                                  | pelvis, ribs, sternal, femoral, and lumbar transverse process            |
| Taghialatela Scafati et al. (2008) [64] | 10 | W | L   | bicycle accident                  | limited mouth opening and R preauricular pain                                                              | radiography, CT, and MRI | CT and MRI        | Y            | 21              | 4                | to the R       | anterior                    | N  | N  | N  | N                           | NR               | N  | headache                                                                                                | bilateral condyle and symphysis            | N                                                                        |
| Menon & Sinha (2008) [65]               | 30 | W | L   | MVA                               | restricted mouth opening and bilateral preauricular pain                                                   | radiography and CT       | CT                | Y            | 28              | NR               | to the L       | posterior                   | Y  | Y  | N  | N                           | NR               | N  | lateral dislocation of the R condyle                                                                    | L subcondyle                               | fifth, sixth, and seventh ribs and humerus                               |
| Lloyd & Sivarajasingam (2010) [66]      | 20 | M | L   | MVA                               | multiple maxillofacial injuries                                                                            | CT                       | CT                | N            | immediate       | NR               | to the L       | NR                          | N  | N  | N  | N                           | intact           | N  | facial lacerations and multiple teeth fractures                                                         | R angle                                    | N                                                                        |
| Man et al. (2011) [67]                  | 32 | W | L   | MVA                               | malocclusion and limited mouth opening                                                                     | CT                       | CT                | Y            | 10              | NR               | to the L       | anterior                    | N  | Y  | N  | N                           | NR               | N  | cerebral contusion and facial ruptures                                                                  | N                                          | N                                                                        |
| Hayashi et al. (2011) [68]              | 18 | W | L   | MVA                               | abrasion in the region of the chin, malocclusion, and limited mouth opening                                | NR                       | NR                | NR           | NR              | NR               | NR             | NR                          | NR | NR | NR | NR                          | NR               | NR | NR                                                                                                      | NR                                         | NR                                                                       |
| Struwer et al. (2012) [69]              | 36 | M | R   | assault                           | facial and jugular swelling and tenderness on the R TMJ                                                    | CT                       | 3DCT              | N            | immediate       | severely reduced | NR             | slight                      | N  | N  | N  | epidural hematoma           | NR               | N  | cerebral concussion, drowsiness, and nausea                                                             | mandibular body, ramus, and zygomatic arch | paranasal sinuses, lateral orbital wall and floor, and pterygoid process |
| Yoshida & Hyo (2012) [70]               | 5  | W | L   | fall from a bar                   | L preauricular pain and malocclusion                                                                       | radiography, CT, and MRI | CT                | Y            | immediate       | 10               | 8 mm to the L  | anterior                    | N  | N  | N  | N                           | NR               | N  | N                                                                                                       | N                                          | N                                                                        |
| Jiao et al. (2013) [71]                 | 36 | M | L   | bicycle accident                  | L preauricular pain, limitation of jaw mobility, open bite, and deviation                                  | CT                       | 3DCT              | N            | immediate       | 15               | to the L       | anterior open bite of 15 mm | Y  | N  | N  | N                           | NR               | N  | contusion of the L temporal lobe                                                                        | N                                          | N                                                                        |
| García-Guevara et al. (2013) [72]       | 33 | W | R   | MVA                               | limited mouth opening, pain, and mandibular deviation                                                      | CT                       | CT                | Y            | immediate       | NR               | to the R       | NR                          | N  | N  | N  | N                           | NR               | N  | N                                                                                                       | N                                          | N                                                                        |
| Lee et al. (2013) [73]                  | 53 | W | L   | chronic osteomyelitis             | trismus                                                                                                    | CT                       | CT                | N            | immediate       | NR               | NR             | NR                          | N  | N  | N  | N                           | epidural abscess | N  | L facial nerve paresis, memory problems, continuous headaches, confusion, dysphagia, and pneumocephalus | L ramus                                    | N                                                                        |
| Tutela et al. (2013) [74]               | 72 | W | R   | fall from a bed                   | bilateral TMJ pain                                                                                         | CT                       | CT                | N            | immediate       | NR               | NR             | anterior open bite of 15 mm | N  | N  | N  | intraparenchymal hemorrhage | NR               | N  | chin laceration                                                                                         | L condyle                                  | N                                                                        |

|                                |    |   |   |                             |                                                                  |                                    |                      |   |                   |    |                |                             |    |    |    |                                                 |              |    |                                                                            |                                               |                                                                                                                                                              |
|--------------------------------|----|---|---|-----------------------------|------------------------------------------------------------------|------------------------------------|----------------------|---|-------------------|----|----------------|-----------------------------|----|----|----|-------------------------------------------------|--------------|----|----------------------------------------------------------------------------|-----------------------------------------------|--------------------------------------------------------------------------------------------------------------------------------------------------------------|
| Zhang et al. (2014) [75]       | 23 | W | R | MVA                         | restriction of jaw movement and R preauricular pain              | CT                                 | CT                   | N | NR                | NR | to the R       | L posterior                 | N  | N  | N  | N                                               | NR           | N  | N                                                                          | N                                             |                                                                                                                                                              |
|                                | 39 | M | L | accident                    | difficulty to open the mouth                                     | CT                                 | CT                   | N | NR                | 12 | to the L       | NR                          | N  | N  | N  | N                                               | NR           | N  | R dislocation, L preauricular pain, edge-to-edge occlusion, and cross-bite | N                                             | N                                                                                                                                                            |
| Vaezi et al. (2014) [76]       | 32 | W | R | MVA                         | facial laceration and limited mouth opening                      | radiography and CT                 | CT                   | Y | immediate         | NR | to the R       | posterior                   | N  | N  | N  | N                                               | small tear   | N  | R TMJ tenderness                                                           | N                                             | N                                                                                                                                                            |
| Oberman et al. (2014) [77]     | 10 | W | R | bicycle accident            | bilateral TMJ pain and malocclusion                              | CT                                 | CT                   | Y | immediate         | 16 | to the R       | NR                          | N  | N  | N  | N                                               | NR           | N  | questionable muffled hearing                                               | N                                             | N                                                                                                                                                            |
| Asai et al. (2014) [78]        | 17 | W | R | bicycle accident            | malocclusion and limited mouth opening                           | radiography, CT, and MRI           | CT                   | N | 1                 | 15 | to the R       | anterior                    | N  | N  | N  | subdural hematoma                               | NR           | N  | chin laceration                                                            | N                                             | N                                                                                                                                                            |
|                                | 13 | W | R | fall during exercise        | limited mouth opening and malocclusion                           | CT                                 | CT                   | Y | immediate         | 15 | to the R       | anterior                    | N  | N  | N  | N                                               | NR           | N  | N                                                                          | N                                             | N                                                                                                                                                            |
| He et al. (2015) [79]          | 25 | W | R | MVA                         | limited mouth opening and malocclusion                           | CT                                 | CT                   | Y | 14                | NR | to the R       | anterior open bite of 10 mm | N  | N  | N  | N                                               | partial tear | N  | scalp contusion                                                            | N                                             | N                                                                                                                                                            |
|                                | 22 | W | L | MVA                         | malocclusion                                                     | CT                                 | CT                   | Y | 150               | NR | NR             | NR                          | N  | N  | N  | N                                               | intact       | N  | serious brain injury and coma for 2 months                                 | R mandibular body                             | extensive skull base fracture                                                                                                                                |
| Temiz et al. (2015) [80]       | 35 | W | L | fall                        | limited mouth opening, anterior open bite, and preauricular pain | CT                                 | CT                   | N | immediate         | NR | NR             | NR                          | N  | N  | N  | N                                               | NR           | N  | chin laceration                                                            | N                                             | N                                                                                                                                                            |
|                                | 18 | W | R | MVA                         | difficulty to open the mouth                                     | CT                                 | CT                   | N | 21                | NR | to the R       | anterior                    | N  | N  | N  | N                                               | NR           | N  | R preauricular tenderness                                                  | N                                             | N                                                                                                                                                            |
| Zhang et al. (2016) [81]       | 20 | W | R | MVA                         | jaw pain exacerbated by talking and movement                     | CT                                 | CT                   | Y | immediate         | NR | NR             | NR                          | Y  | NR | NR | N                                               | NR           | NR | amnesia and trismus                                                        | R condyle and ramus and L ramus and symphysis | maxillary sinus, L occipital condyle, L clivus, inferior mastoid portion of the temporal bone, C1 transverse process, rib, clavicle, sacroiliac, and fibular |
| Arya & Chigurupati (2016) [82] | 15 | W | L | bicycle accident            | NR                                                               | radiography and CT                 | CT                   | N | NR                | NR | 10 mm to the L | anterior open bite of 8 mm  | NR | NR | NR | L temporal lobe hemorrhage                      | NR           | NR | L temporal lobe contusion                                                  | N                                             | NR                                                                                                                                                           |
|                                | 5  | W | L | fall from a bed             | facial asymmetry                                                 | radiography                        | radiography          | N | NR                | NR | to the L       | posterior                   | NR | NR | NR | NR                                              | NR           | NR | NR                                                                         | N                                             | NR                                                                                                                                                           |
| Kanno et al. (2016) [83]       | 51 | M | R | fall after drinking alcohol | reduced ability to open or close the mouth                       | CT                                 | CT                   | Y | immediate         | NR | to the R       | NR                          | N  | N  | N  | NR                                              | partial tear | N  | chin laceration, R preauricular swelling, and cerebral contusion           | R condylar head                               | N                                                                                                                                                            |
| Zamorano et al. (2016) [84]    | 9  | M | R | accidental fall             | severe limitation to open the mouth                              | CT                                 | CT                   | Y | 1,095 (3 years)   | 6  | to the R       | NR                          | N  | N  | N  | N                                               | intact       | N  | facial asymmetry, lip incompetence, and micrognathia                       | N                                             | N                                                                                                                                                            |
| Rikhsoslo & Bobat (2016) [85]  | 17 | M | R | MVA                         | inability to open the mouth                                      | radiography and CT                 | CT                   | N | 180               | 3  | NR             | anterior                    | Y  | N  | N  | N                                               | NR           | N  | bilateral TMJ ankylosis                                                    | L condylar head                               | N                                                                                                                                                            |
| Pinares & Urzúa (2016) [86]    | 13 | W | L | MVA                         | limited mouth opening                                            | radiography, cone-beam CT, and MRI | cone-beam CT and MRI | Y | 2,190 (6 years)   | NR | NR             | NR                          | N  | N  | N  | N                                               | NR           | N  | L TMJ ankylosis                                                            | N                                             | N                                                                                                                                                            |
| Yadegari et al. (2016) [87]    | 10 | W | R | MVA                         | R pain and deviation                                             | radiography and CT                 | CT                   | Y | immediate         | NR | to the R       | anterior                    | N  | N  | N  | N                                               | NR           | N  | chin laceration                                                            | N                                             | N                                                                                                                                                            |
| Lindell & Thor (2017) [88]     | 15 | W | L | fall due to epilepsy        | lateral open bite                                                | CT                                 | CT                   | N | immediate         | NR | NR             | lateral                     | N  | N  | N  | N                                               | NR           | N  | N                                                                          | symphysis and bilateral condyle               | N                                                                                                                                                            |
| De Mol et al. (2017) [89]      | 63 | W | R | NR                          | severe limitation of mandibular mobility                         | CT and MRI                         | CT and MRI           | Y | 19,710 (54 years) | 16 | 2 mm to the R  | NR                          | N  | N  | N  | N                                               | NR           | N  | N                                                                          | N                                             | N                                                                                                                                                            |
| Liu et al. (2017) [90]         | 29 | W | L | MVA                         | limited mouth opening, malocclusion, and chin deviation          | 3DCT                               | 3DCT                 | Y | 35                | NR | to the L       | anterior                    | N  | N  | N  | N                                               | NR           | N  | coma                                                                       | L zygomatic arch                              | N                                                                                                                                                            |
| Kurimori et al. (2018) [91]    | 23 | W | L | MVA                         | anterior open bite and limitation of jaw movement                | 3DCT                               | 3DCT                 | Y | immediate         | NR | NR             | anterior                    | N  | N  | N  | N                                               | laceration   | N  | hypovolemic shock                                                          | L condylar neck and R parasymphysis           | N                                                                                                                                                            |
|                                | 34 | M | L | MVA                         | difficulty to open the mouth                                     | CT                                 | CT                   | N | 2,190 (6 years)   | NR | NR             | NR                          | N  | N  | N  | N                                               | NR           | N  | L TMJ ankylosis                                                            | N                                             | N                                                                                                                                                            |
| Monteiro et al. (2019) [92]    | 22 | M | R | MVA                         | R preauricular pain                                              | CT                                 | CT                   | Y | immediate         | NR | NR             | NR                          | Y  | NR | Y  | NR                                              | lesion       | NR | facial nerve deficit and cerebral contusion                                | N                                             | L radius                                                                                                                                                     |
| Liau et al. (2019) [93]        | 22 | W | R | fall while skateboarding    | R temporal region pain and limited mouth opening                 | CT                                 | CT                   | N | immediate         | 15 | NR             | anterior                    | N  | Y  | Y  | N                                               | intact       | N  | hemotympanum and pneumocranium                                             | N                                             | N                                                                                                                                                            |
| Holz et al. (2019) [94]        | 36 | W | L | fall out of a window        | NA                                                               | NA                                 | autopsy              | Y | NR                | NA | NA             | NA                          | Y  | NR | NR | subdural hematoma                               | NR           | NR | chin laceration and internal bleeding due to rupture of the thoracic aorta | mandibular body                               | ribs, pelvis, both arms, and lumbar spine                                                                                                                    |
|                                | 81 | M | L | fall downstairs             | NA                                                               | NA                                 | autopsy              | Y | NR                | NA | NA             | NA                          | NR | NR | NR | epidural, subdural, and subarachnoid hemorrhage | NR           | NR | NR                                                                         | N                                             | N                                                                                                                                                            |

|                                           |    |   |   |                                 |                                                                             |                    |            |    |           |                             |               |                          |    |    |    |                                                                |            |    |                                                                       |                                            |                                                                                                            |
|-------------------------------------------|----|---|---|---------------------------------|-----------------------------------------------------------------------------|--------------------|------------|----|-----------|-----------------------------|---------------|--------------------------|----|----|----|----------------------------------------------------------------|------------|----|-----------------------------------------------------------------------|--------------------------------------------|------------------------------------------------------------------------------------------------------------|
| Chen et al. (2019) [95]                   | 20 | M | R | MVA                             | malocclusion and limited mouth opening                                      | radiography and CT | CT         | N  | NR        | 10                          | 9 mm to the R | anterior and L posterior | N  | N  | N  | NR                                                             | NR         | N  | arachnoid cyst                                                        | N                                          | R femur, malleolus, L acetabulum, radius, and tibia                                                        |
| Esquenazi et al. (2019) [96]              | 23 | W | L | fall on the curbside            | L decreased hearing, nausea, emesis, facial and L jaw pain                  | CT                 | CT         | Y  | immediate | 15                          | NR            | NR                       | N  | N  | Y  | a small area of hemorrhage, subdural hemorrhage                | Tom        | N  | chin laceration, pneumocephalus, and contusion in the L temporal lobe | L condyle                                  | L mastoid process                                                                                          |
| Kypta et al. (2019) [97]                  | 31 | W | R | assault                         | headache, dizziness, limited mouth opening, Rear pain, nausea, and vomiting | radiography and CT | CT         | N  | 1         | NR                          | N             | Y                        | N  | Y  | N  | R temporal lobe intracerebral hemorrhage and subdural hematoma | NR         | NR | pneumocephalus                                                        | N                                          | N                                                                                                          |
| Romano et al. (2019) [98]                 | 17 | W | L | MVA                             | otorrhagia, epistaxis and rhinorrhea                                        | CT                 | CT         | Y  | immediate | NR                          | NR            | Y                        | NR | Y  | NR | intracranial hemorrhage                                        | Laceration | NR | pneumocephalus                                                        | L horizontal mandibular branch and R angle | L temporal bone, sphenoid, orbit walls, nasal bones, R pterygoid processes, and walls of maxillary sinuses |
| Congjiusta & Champion (2020) [99]         | 25 | W | R | fall downstairs                 | NR                                                                          | NR                 | NR         | NA | NR        | NR                          | NR            | NR                       | NR | NR | NR | temporal lobe intraparenchymal hemorrhage                      | NR         | NR | NR                                                                    | R parasymphysis and L condyle              | NR                                                                                                         |
| Ramani et al. (2021) [100]                | 20 | W | L | MVA                             | restricted jaw movements and pain in the jaws                               | CT                 | CT         | N  | immediate | anterior                    | Y             | N                        | N  | N  | N  | N                                                              | NR         | N  | chin laceration and pneumocephalus                                    | N                                          | N                                                                                                          |
| Diez-Suárez & Paredes-Fanera (2021) [101] | 13 | M | L | bicycle accident                | mandibular lock                                                             | CT                 | CT         | Y  | immediate | anterior open bite of 10 mm | N             | N                        | N  | N  | N  | N                                                              | NR         | N  | multiple facial abrasions and chin laceration                         | N                                          | N                                                                                                          |
| Zumbrunn Wojczyńska et al. (2021) [102]   | 77 | W | L | degenerative changes of the TMJ | limited mouth opening and L preauricular pain during mastication            | CT and MRI         | CT and MRI | N  | immediate | NR                          | N             | N                        | N  | N  | N  | N                                                              | NR         | N  | N                                                                     | N                                          | N                                                                                                          |
| Motazedian et al. (2021) [103]            | 23 | M | L | orthognathic surgery            | facial asymmetry                                                            | CT                 | CT         | N  | immediate | NR                          | N             | N                        | N  | N  | N  | N                                                              | NR         | N  | N                                                                     | N                                          | N                                                                                                          |
| D'Hondt et al. (2022) [104]               | 58 | M | L | chronic osteomyelitis           | reduced mouth opening                                                       | CT and MRI         | CT and MRI | N  | immediate | N                           | N             | N                        | Y  | N  | Y  | N                                                              | NR         | N  | L facial nerve paresis                                                | N                                          | N                                                                                                          |

M, man; W, woman; L, left; R, right; Y, yes; N, no; NR, not reported; NA, not applicable; MVA, motor vehicle accidents; TMJ, temporomandibular joint; CSF, cerebrospinal fluid; CT, computed tomography; 3D, three-dimensional; MRI, magnetic resonance imaging.
